# Supplementary material for: Antibacterial and Antibiofilm Effects of Photodynamic Treatment with Curcuma L. and Trans-Cinnamaldehyde against Listeria monocytogenes
Source: MDPI journal article supplement (doi:10.3390/molecules29030685), 2024-02-01
Supplement: s1 [file s1]

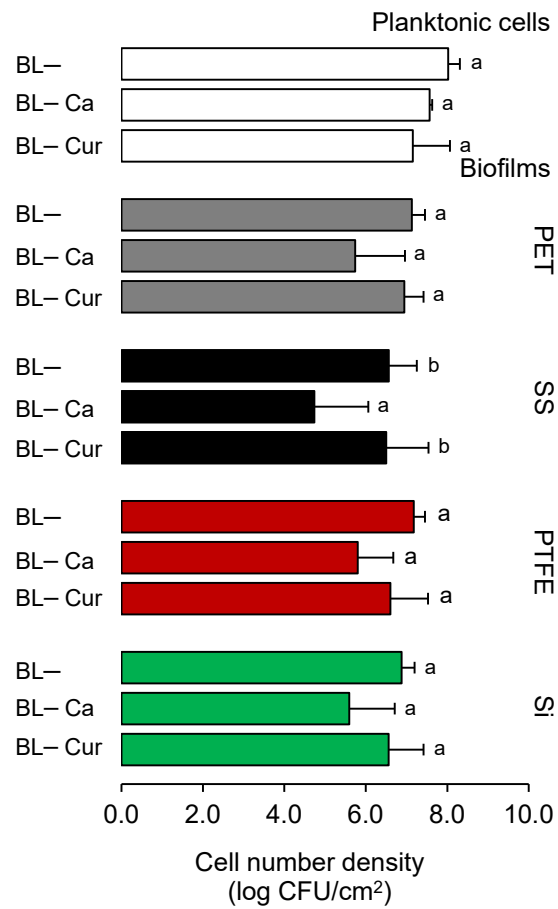

**Supplementary Figure S1.** Cell numbers of *Listeria monocytogenes* ATCC 15313 planktonic cells and biofilms established on silicone rubber (Si), polytetrafluoroethylene (PTFE), stainless steel 316 (SS), and polyethylene terephthalate (PET) in *Curcuma* L. (Cur)- and *t*-cinnamaldehyde (Ca)-based non-photosensitization (BL-) experiments.

**Supplementary Table S1.** Percent of *Listeria monocytogenes* ATCC 15313 planktonic cells (% of total) in *Curcuma* L. (Cur)- and *t*-cinnamaldehyde (Ca)-based (non-)photosensitization experiments as measured by FCM with CFDA/PI and TOTO<sup>®</sup>-1 staining.

|           |              | CFDA/PI  |            |          |          |            |           | TOTO <sup>®</sup> -1 |          |
|-----------|--------------|----------|------------|----------|----------|------------|-----------|----------------------|----------|
|           |              | BL–      |            |          | BL+      |            |           | BL–                  | BL+      |
|           | Cells        | Dead     | Non-active | Active   | Dead     | Non-active | Active    | Dead                 | Dead     |
| <b>Tx</b> | <b>Alone</b> | 16.5±9.9 | 33.6±0.6   | 50.0±9.3 | 7.5±2.5  | 54.6±14.0  | 38.0±11.5 | 4.2±1.3              | 5.6±1.0  |
|           | <b>Ca</b>    | 6.6±2.9  | 49.2±6.5   | 44.2±9.3 | 13.9±2.5 | 56.0±3.0   | 30.2±0.7  | 4.0±0.5              | 8.1±2.7  |
|           | <b>Cur</b>   | 7.9±2.2  | 41.8±1.1   | 50.2±3.4 | 29.1±0.2 | 70.5±0.2   | 0.4±0.0   | 5.6±0.9              | 22.8±2.2 |

**Supplementary Table S2.** Percent of *Listeria monocytogenes* ATCC 15313 biofilms established on silicone rubber (Si), polytetrafluoroethylene (PTFE), stainless steel 316 (SS), and polyethylene terephthalate (PET) in *Curcuma* L. (Cur)- and *t*-cinnamaldehyde (Ca)-based non-photosensitization (BL–) experiments as measured by FCM with CFDA/PI.

|             | BL–  |            |        | BL– Ca |            |        | BL– Cur |            |        |
|-------------|------|------------|--------|--------|------------|--------|---------|------------|--------|
|             | Dead | Non-active | Active | Dead   | Non-active | Active | Dead    | Non-active | Active |
| <b>PET</b>  | 9.8  | 41.5       | 48.7   | 27.5   | 26.1       | 46.5   | 12.1    | 57.4       | 30.5   |
| <b>SS</b>   | 20.5 | 29.6       | 49.9   | 12.3   | 46.2       | 41.6   | 22.5    | 44.1       | 33.4   |
| <b>PTFE</b> | 4.9  | 43.3       | 50.1   | 9.2    | 20.1       | 70.8   | 9.0     | 41.5       | 49.4   |
| <b>Si</b>   | 4.7  | 42.6       | 52.7   | 10.0   | 33.7       | 56.2   | 10.4    | 46.4       | 43.2   |

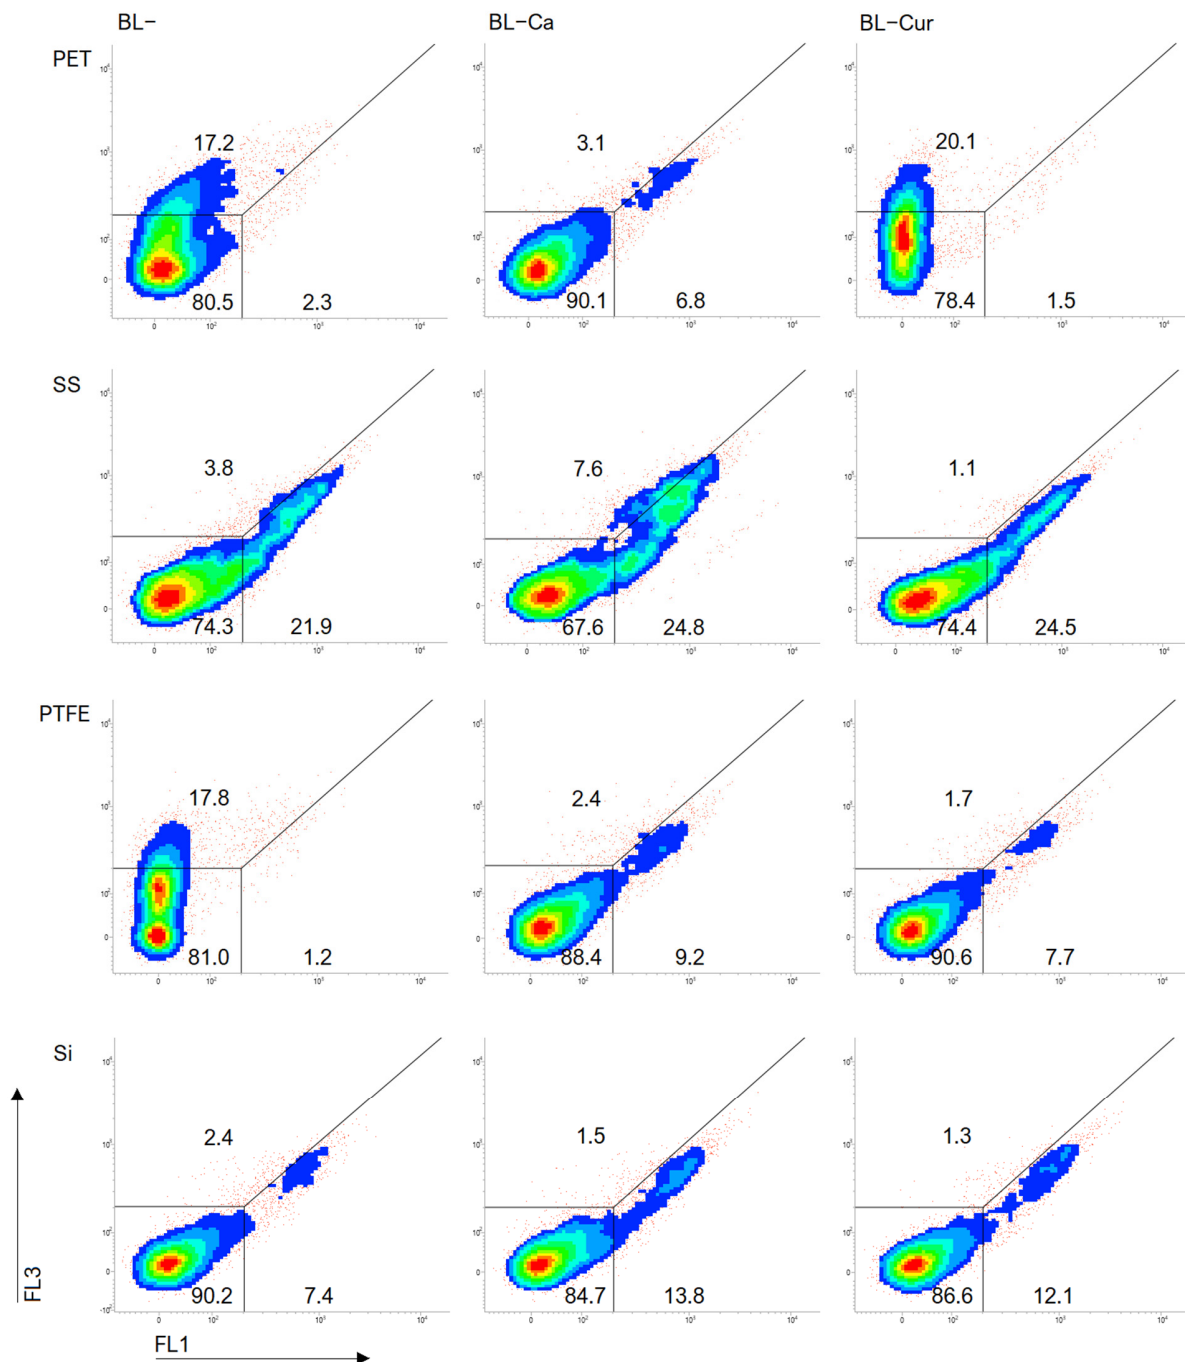

**Supplementary Figure S2.** FCM dot plots of *Listeria monocytogenes* ATCC 15313 biofilms established on silicone rubber (Si), polytetrafluoroethylene (PTFE), stainless steel 316 (SS), and polyethylene terephthalate (PET) in *Curcuma* L. (Cur)- and *t*-cinnamaldehyde (Ca)-based non-photosensitization (BL-) experiments as measured by FCM with TOTO®-1 staining.
